# Supplementary material for: Neural Signatures of Pain Modulation in Short-Term and Long-Term Mindfulness Training: A Randomized Active-Control Trial
Source: Atypon-hosted journal article supplement (doi:10.1176/appi.ajp.21020145), 2022-07-28
Supplement: ajp_21020145_correction01.pdf [file ajp_21020145_correction01.pdf]

## **Correction to Wielgosz et al.**

When the article “Neural Signatures of Pain Modulation in Short-Term and Long-Term Mindfulness Training: A Randomized Active-Control Trial,” by Joseph Wielgosz, Ph.D., et al. (doi: 10.1176/appi.ajp.21020145) was published online on July 28, 2022, author Antoine Lutz, Ph.D., was left off the byline. The article was reposted online on September 1, 2022, with the author’s name and affiliation added.
